# Supplementary material for: Pt based PEMFC catalysts prepared from colloidal particle suspensions – a toolbox for model studies
Source: Royal Society of Chemistry journal article supplement (doi:10.1039/c3cp50195g), 2013-01-01
Supplement: c3cp50195g.pdf [file c3cp50195g.pdf]

## Pt based PEMFC catalysts prepared from colloidal particle suspensions – a toolbox for model studies

Jozsef Speder<sup>a</sup>, Lena Altmann<sup>b</sup>, Melanie Roefzaad<sup>a</sup>, Marcus Bäumer<sup>b</sup>, Jacob J.K.

Kirkensgaard<sup>c</sup>, Kell Mortensen<sup>c</sup>, and Matthias Arenz<sup>a\*</sup>

<sup>a</sup> Department of Chemistry, University of Copenhagen, Universitetsparken 5, DK-2100 Copenhagen Ø Denmark

<sup>b</sup>Institute for Applied and Physical Chemistry, University of Bremen, Germany

<sup>c</sup>Niels Bohr Institute, University of Copenhagen, Denmark

\* corresponding author: m.arenz@chem.ku.dk

### Supporting information

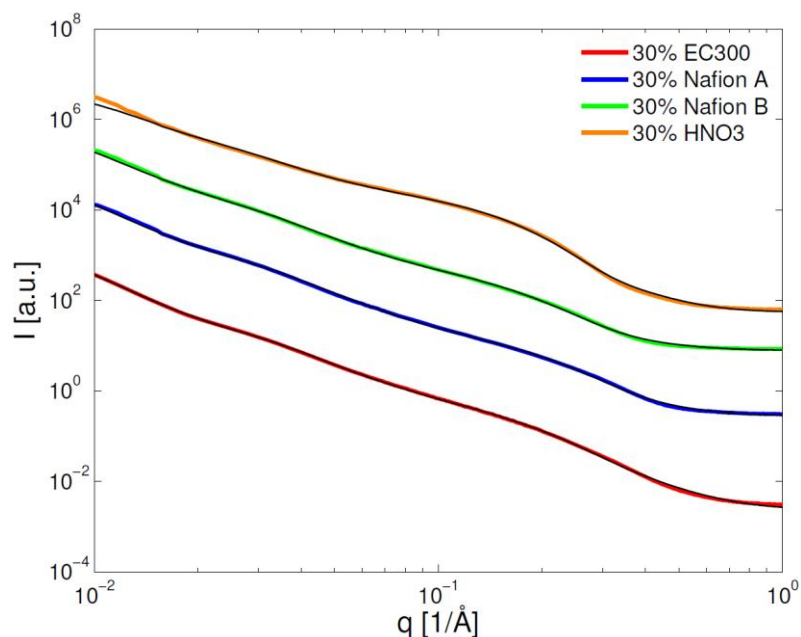

FigureS1. Measured scattering data (black lines) with corresponding fits (colored lines) for the different Pt NPs supported on EC300, EC300- $HNO_3$ , EC300-NafA, and EC300-NafB shown in Figure1.
